# Supplementary material for: Outcome Prediction Based on Automatically Extracted Infarct Core Image Features in Patients with Acute Ischemic Stroke
Source: MDPI journal article supplement (doi:10.3390/diagnostics12081786), 2022-07-23
Supplement: s1 [file s1]

### Supplementary Materials

**Table S1** Baseline and follow-up characteristics of the selected study and total population of the MR CLEAN NO-IV trial

| Characteristic                                 | Study population<br>MR CLEAN NO-IV<br>(n = 206) | Total population MR<br>CLEAN NO-IV (n =<br>539) |
|------------------------------------------------|-------------------------------------------------|-------------------------------------------------|
| Male sex, n (%)                                | 111 (54)                                        | 305 (57)                                        |
| Age, mean (SD)                                 | 69 (13)                                         | 70 (13)                                         |
| Pre-stroke mRS >0, n (%)                       | 46 (22)                                         | 164 (30)                                        |
| EVT allocation, n (%)                          | 97 (47)                                         | 273 (41)                                        |
| Left sided stroke, n (%)                       | 115 (56)                                        | 290 (54)                                        |
| Thrombus location, n (%)                       |                                                 |                                                 |
| ICA                                            | 48 (23)                                         | 118 (22) (n=539)                                |
| M1                                             | 123 (60)                                        | 330 (61) (n=539)                                |
| M2                                             | 34 (17)                                         | 85 (16) (n=539)                                 |
| Other                                          | 1 (0.5)                                         | 5 (0.9) (n=539)                                 |
| Follow-up infarct volume (mL), median<br>(IQR) | 17 (7.3 to 67)                                  | 11 (6 to 74)                                    |
| mRS≤2, n (%)                                   | 115 (56%)                                       | 270 (50%)                                       |
